# Supplementary material for: Modulation of let-7 miRNAs controls the differentiation of effector CD8 T cells
Source: eLife journal article supplement (doi:10.7554/elife.26398), 2017-07-24
Supplement: supp [file elife-26398-supp-v1.zip]

Archive with 19 entries (19 files):
- elife_poa_e26398_Figure_5_figure_supplement_2.pdf
- elife_poa_e26398_Figure_2_figure_supplement_1.pdf
- elife_poa_e26398_Supplementary_File_1.xlsx
- elife_poa_e26398_Figure_1_Source_Data_1.xlsx
- elife_poa_e26398_Figure_5_figure_supplement_1.pdf
- elife_poa_e26398_Figure_1_figure_supplement_1.pdf
- elife_poa_e26398_Figure_1_figure_supplement_3.pdf
- elife_poa_e26398_Supplementary_File_2.xlsx
- elife_poa_e26398_Figure_6_figure_supplement_3.pdf
- elife_poa_e26398_Figure_3_figure_supplement_1.pdf
- elife_poa_e26398_Figure_6_Source_Data_1.xlsx
- elife_poa_e26398_Figure_6_figure_supplement_1.pdf
- elife_poa_e26398_Figure_6_figure_supplement_2.pdf
- elife_poa_e26398_Figure_2_Source_Data_1.xlsx
- elife_poa_e26398_Figure_3_Source_Data_1.xlsx
- elife_poa_e26398_Figure_4_figure_supplement_1.pdf
- elife_poa_e26398_Figure_1_figure_supplement_2.pdf
- elife_poa_e26398_Figure_5_Source_Data_1.xlsx
- elife_poa_e26398_Figure_4_Source_Data_1.xlsx
