# Supplementary material for: Modulation of let-7 miRNAs controls the differentiation of effector CD8 T cells
Source: eLife journal article supplement (doi:10.7554/elife.26398), 2017-07-24
Supplement: supp [file elife-26398-supp-v1.zip › elife_poa_e26398_Figure_1_Source_Data_1.xlsx]

## Sheet: Figure 1A
	let-7a	let-7b	let-7c	let-7d	let-7e	let-7f	let-7g	let-7i
Naive	0.0991241	0.161811	0.12713	0.0377176	0.247651	0.0614425	0.203681	0.0614425
	0.101348	0.179666	0.132806	0.0378487	0.23872	0.0612728	0.193498	0.0548407
	0.101724	0.168024	0.130918	0.0372591	0.239939	0.0612876	0.206146	0.054702
0.1 ug	0.0961245	0.120579	0.105554	0.0495163	0.22053	0.0486994	0.165516	0.0547896
	0.0968608	0.11818	0.100346	0.048196	0.211695	0.0474666	0.159216	0.0531442
	0.0953519	0.119113	0.102693	0.0501504	0.211306	0.0466624	0.161701	0.0557998
0.5 ug	0.0744654	0.0611592	0.0526185	0.0427988	0.128133	0.038439	0.104946	0.040434
	0.0691428	0.0597351	0.0545878	0.0438501	0.12637	0.0412553	0.101161	0.0407155
	0.071847	0.0610473	0.0534033	0.0437392	0.128342	0.0354289	0.0993091	0.0416099
1 ug	0.0645569	0.0413409	0.0440021	0.0370268	0.119635	0.0351755	0.0878822	0.0309636
	0.0650063	0.0471606	0.0387066	0.035249	0.122999	0.0339775	0.0792592	0.0327519
	0.0630688	0.0495858	0.0430475	0.0373971	0.136604	0.0371646	0.0835666	0.0357744

## Sheet: FIgure 1B
	let-7a	let-7b	let-7c	let-7d	let-7e	let-7f	let-7g	let-7i
0 h	0.0440609	0.111618	0.0848844	0.0611987	0.262546	0.0451429	0.281	0.109549
	0.0452737	0.124638	0.0760882	0.0583072	0.265506	0.0455255	0.274108	0.110553
	0.044868	0.121063	0.0780656	0.058958	0.268284	0.0464503	0.277937	0.104374
15 h	0.0276606	0.0422465	0.0303528	0.0586378	0.234877	0.0404133	0.20747	0.0795484
	0.0273209	0.0431992	0.031558	0.0616887	0.223624	0.0425455	0.195623	0.0803337
	0.0275303	0.0440158	0.0305892	0.0572399	0.233285	0.040728	0.195625	0.0782462
24 h	0.0219898	0.029935	0.0163335	0.0487645	0.185562	0.0312278	0.119408	0.0666605
	0.0221454	0.0281865	0.0168063	0.0490756	0.190802	0.0311667	0.119671	0.0675523
	0.0216298	0.0308874	0.016234	0.0504209	0.196986	0.0311023	0.120672	0.0710099
48 h	0.0158942	0.0131358	0.00760753	0.0296391	0.108717	0.0202581	0.092503	0.0425896
	0.0192742	0.0160511	0.00784407	0.0302655	0.117997	0.0219265	0.0913036	0.044158
	0.0165254	0.0150388	0.00913634	0.0296429	0.108055	0.0195164	0.0877675	0.0395777
72 h	0.0145548	0.0103994	0.00367165	0.0204698	0.0682817	0.014147	0.0547743	0.0424422
	0.0160289	0.00928306	0.00386536	0.021209	0.071934	0.0154936	0.0552002	0.0426538
	0.0148317	0.010215	0.00322571	0.0191413	0.0700647	0.0145064	0.0523318	0.0402975

## Sheet: Figure 1C
FSC
WT		Lin28Tg
Spleen	Lymph node	Spleen	Lymph node
0.845794	1.03255	1.38084	1.16551
1.10514	1.02424	1.3715	1.16551
1.04907	0.943213	1.21495	1.11565

## Sheet: Figure 1D
%Ki67+ cells
WT		Lin28Tg
Spleen	Lymph node	Spleen	Lymph node
2.74	2.35	24.2	37.7
1.98	3.61	31.7	27.3
1.02	2.66	32.6	33.4

## Sheet: Figure 1E
%BrdU+ cells
WT		Lin28Tg
Spleen	Lymph node	Spleen	Lymph node
2.2	0.22	7.8	1.05
1.67	0.14	7.87	0.95
3.71	0.14	12.5	0.73
3.49	0.17	9.08	0.51
1.23	0.094	6.25	0.58
1.97	0.064

## Sheet: Figure 1-FS1A
	let-7a	let-7b	let-7c	let-7d	let-7e	let-7f	let-7g	let-7i
0 ug	0.966286	0.935531	0.958173	0.985038	1.00481	0.983861	0.994589	1.0595
	1.00523	1.05691	1.01844	1.00573	0.985495	0.998287	0.961375	0.962181
	1.02849	1.00755	1.02339	1.00923	1.0097	1.01785	1.04404	0.978321
0.1 ug	0.937044	0.697142	0.79555	1.29317	0.894769	0.779809	0.808229	0.944777
	0.960721	0.695212	0.769516	1.28069	0.873928	0.77335	0.791049	0.932417
	0.964057	0.714261	0.80275	1.35841	0.889204	0.77496	0.818945	0.997955
0.5 ug	0.725907	0.3536	0.396581	1.11774	0.519881	0.615512	0.512457	0.697233
	0.685798	0.351401	0.418613	1.16521	0.521686	0.672152	0.502608	0.714355
	0.72641	0.36607	0.417454	1.18475	0.540083	0.588396	0.502956	0.744175
1 ug	0.629316	0.239018	0.33164	0.966998	0.485403	0.563255	0.429135	0.533927
	0.64477	0.277429	0.296826	0.936652	0.507772	0.553578	0.393792	0.574633
	0.637658	0.297341	0.336503	1.01296	0.574849	0.617222	0.423227	0.639809

## Sheet: Figure 1-FS1B
	let-7a	let-7b	let-7c	let-7d	let-7e	let-7f	let-7g	let-7i
0 h	0.981551	0.933929	1.06159	1.02517	0.985564	0.984109	1.00838	1.00968
	0.996633	1.03053	0.940324	0.965175	0.98488	0.996541	0.972003	0.99723
	1.02182	1.03554	0.998082	1.00965	1.02956	1.0519	1.01962	0.974004
15 h	0.616199	0.353485	0.379603	0.982273	0.881697	0.895231	0.744511	0.726147
	0.60143	0.357179	0.390005	1.02115	0.829523	0.93131	0.693692	0.724638
	0.62697	0.376499	0.391088	0.980232	0.895245	0.922317	0.717657	0.730184
24 h	0.489869	0.250472	0.204272	0.81688	0.696577	0.691756	0.4285	0.608502
	0.487498	0.233051	0.207699	0.812363	0.707771	0.682232	0.424362	0.609345
	0.492593	0.264203	0.207555	0.863457	0.755946	0.704335	0.442689	0.662656
48 h	0.354077	0.109909	0.0951423	0.496499	0.408108	0.448755	0.331949	0.388773
	0.424294	0.132713	0.0969397	0.500993	0.437702	0.479965	0.323768	0.39832
	0.376347	0.128638	0.11681	0.507635	0.414666	0.441964	0.321978	0.369334
72 h	0.32424	0.0870138	0.0459189	0.342901	0.256321	0.313383	0.196559	0.387428
	0.352852	0.076754	0.0477694	0.351078	0.266835	0.339151	0.195743	0.384752
	0.337775	0.0873763	0.0412412	0.327794	0.268878	0.328508	0.191981	0.376051

## Sheet: Figure 1-FS2A
	let-7a	let-7b	let-7c	let-7d	let-7e	let-7f	let-7g	let-7i
0 h	0.981551	0.933929	1.06159	1.02517	0.985564	0.984109	1.00838	1.00968
	0.996633	1.03053	0.940324	0.965175	0.98488	0.996541	0.972003	0.99723
	1.02182	1.03554	0.998082	1.00965	1.02956	1.0519	1.01962	0.974004
12 h	0.114762	0.0641112	0.063978	0.0727816	0.140021	0.0545877	0.252914	0.0812054
	0.120977	0.0713375	0.0586716	0.0705018	0.124292	0.0531718	0.227637	0.0822869
	0.118218	0.0768679	0.0599758	0.0750775	0.142154	0.0565443	0.244605	0.0935269
24 h	0.108096	0.0433563	0.0409891	0.0731188	0.0771808	0.0427594	0.175968	0.0886575
	0.0944354	0.0412767	0.0445161	0.0785346	0.0960196	0.0492228	0.171048	0.090777
	0.0995243	0.0426649	0.0427537	0.0766905	0.0962674	0.0439252	0.173282	0.092218
48 h	0.0551327	0.0250691	0.024827	0.0665256	0.0631117	0.0340324	0.114392	0.0776996
	0.0660242	0.0233431	0.0232623	0.0642187	0.0649799	0.0372179	0.114716	0.0790077
	0.0525145	0.0241281	0.0251179	0.06815	0.0575858	0.0340042	0.118	0.0806522
72 h	0.32424	0.0870138	0.0459189	0.342901	0.256321	0.313383	0.196559	0.387428
	0.352852	0.076754	0.0477694	0.351078	0.266835	0.339151	0.195743	0.384752
	0.337775	0.0873763	0.0412412	0.327794	0.268878	0.328508	0.191981	0.376051

## Sheet: Figure 1-FS2B
	miR-17
	Relative to U6	Relative to sno135
0 h	0.996808	0.996808
	0.977649	0.977649
	1.02554	1.02554
12 h	4.60241	5.72942
	4.37229	5.44295
	4.7187	5.87418
24 h	5.39787	7.19696
	5.36802	7.15717
	5.47322	7.29743
48 h	3.41698	7.50953
	3.34666	7.35498
	3.42884	7.53559

## Sheet: Figure 1-FS3A
	let-7a	let-7b	let-7c	let-7d	let-7e	let-7f	let-7g	let-7i
WT Day 0	0.083099	0.00479244	0.0689157	0.0558606	0.163343	0.0501008	0.369841	0.204048
	0.0923637	0.00486775	0.067427	0.0537151	0.169984	0.0529388	0.357117	0.201586
	0.0798732	0.00515382	0.0705533	0.0560499	0.156785	0.0474271	0.374972	0.209186
Lin28Tg Day 0	0.0105421	0.00342735	0.0836965	0.00341076	0.0375852	0.00563375	0.017221	0.0162019
	0.00941909	0.00286312	0.0883763	0.00360148	0.0383881	0.00515362	0.017203	0.0163882
	0.010644	0.00312093	0.0887684	0.0035726	0.0393959	0.00572381	0.0175814	0.0166791
WT Day 5	0.0587192	0.000595743	0.0166998	0.0604119	0.104819	0.0419256	0.156039	0.134528
	0.0600567	0.000645395	0.0168451	0.0606424	0.109157	0.0405957	0.155876	0.134761
	0.060827	0.000658676	0.0176017	0.0621051	0.111017	0.0415749	0.159304	0.135546
Lin28Tg Day 5	0.0169917	0.000249439	0.00972542	0.00181599	0.0343386	0.00681522	0.0136683	0.00390889
	0.0158373	0.000186113	0.00980321	0.00180157	0.0344219	0.00644533	0.0133638	0.00370187
	0.0160849	0.000189286	0.00957081	0.00174792	0.0336758	0.00638922	0.0131286	0.00381224

[truncated: 1 more sheets: Figure 1-FS3B]
