# Supplementary material for: Modulation of let-7 miRNAs controls the differentiation of effector CD8 T cells
Source: eLife journal article supplement (doi:10.7554/elife.26398), 2017-07-24
Supplement: supp [file elife-26398-supp-v1.zip › elife_poa_e26398_Figure_2_Source_Data_1.xlsx]

## Sheet: Figure 2B
Number of cells (x10^6)
WT	let-7Tg
27	0.9
28	0.3
15	0.2

## Sheet: Figure 2C
%KLRG1+					%IFNg+TNFa+
Host CD8+ T cells (CD45.1+)		Donor CD8+ T cells (CD45.2+)			Host CD8+ T cells (CD45.1+)		Donor CD8+ T cells (CD45.2+)
Donor cells: WT	Donor cells: let-7Tg	Donor cells: WT	Donor cells: let-7Tg		Donor cells: WT	Donor cells: let-7Tg	Donor cells: WT	Donor cells: let-7Tg
52.5	58.1	33.6	2.34		16.2	11.5	60.8	32.5
49.8	37.3	35	8.79		14	12.3	65.5	46.6
53.9	42.9	42.2	3.95		9.55	11.9	59.6	34.4

## Sheet: Figure 2- FS1A
	let-7a	let-7b	let-7c	let-7d	let-7e	let-7f	let-7g	let-7i
WT Day 0	0.083099	0.00479244	0.0689157	0.0558606	0.163343	0.0501008	0.369841	0.204048
	0.0923637	0.00486775	0.067427	0.0537151	0.169984	0.0529388	0.357117	0.201586
	0.0798732	0.00515382	0.0705533	0.0560499	0.156785	0.0474271	0.374972	0.209186
let-7Tg Day 0	0.0405911	0.00295282	0.0530799	0.0215422	0.0878575	0.0219036	1.30886	0.0881014
	0.0458735	0.00321672	0.0519333	0.0210769	0.0999814	0.0239439	1.22757	0.0891145
	0.0486704	0.00375802	0.0552145	0.0225956	0.100425	0.0227844	1.29342	0.0910113
WT Day 5	0.0587192	0.000595743	0.0166998	0.0604119	0.104819	0.0419256	0.156039	0.134528
	0.0600567	0.000645395	0.0168451	0.0606424	0.109157	0.0405957	0.155876	0.134761
	0.060827	0.000658676	0.0176017	0.0621051	0.111017	0.0415749	0.159304	0.135546
let-7Tg Day 5	0.044429	0.000718683	0.0178077	0.0279239	0.101859	0.031199	2.3064	0.087817
	0.0437109	0.00061044	0.0176785	0.0279335	0.0995895	0.0300839	2.35404	0.0877253
	0.043511	0.000661727	0.0172953	0.0286072	0.0945043	0.030703	2.31422	0.0856457
