# Supplementary material for: Modulation of let-7 miRNAs controls the differentiation of effector CD8 T cells
Source: eLife journal article supplement (doi:10.7554/elife.26398), 2017-07-24
Supplement: supp [file elife-26398-supp-v1.zip › elife_poa_e26398_Figure_3_Source_Data_1.xlsx]

## Sheet: Figure 3B
	Cdc25a					Ccnd2					Ccnf					Cdk6
	WT	let-7Tg	Lin28Tg			WT	let-7Tg	Lin28Tg			WT	let-7Tg	Lin28Tg			WT	let-7Tg	Lin28Tg
Naïve	3.5837	3.08111	3.20602		Naïve	141.186	128.574	151.774		Naïve	0.000948181	0	0		Naïve	1.12775	1.39615	0.575858
	4.09383	3.79593	3.46243			139.629	138.568	158.549			0	0.0182932	0.000889811			1.62727	1.38458	1.01451
	3.86228	3.38335	2.96244			135.81	145.155	159.984			0	0.000204651	0			1.62727	1.21964	1.16456
Activated	15.8798	10.195	24.1807		Activated	120.686	89.6223	215.985		Activated	0.00946041	0.000244273	0.0284937		Activated	13.1329	8.0099	21.8231
	15.9018	8.86909	24.7745			122.796	86.1503	215.536			0.0226102	0.0105164	0.0287914			11.5364	7.15914	22.8605
	16.6924	9.40733	24.5183			129.348	90.0582	226.88			0.0218552	0.0112478	0			14.1734	7.75316	24.1807

## Sheet: Figure 3C
	Myc					Tfap4
	WT	let-7Tg	Lin28Tg			WT	let-7Tg	Lin28Tg
Day 0	24.7745	16.4132	17.4616		Day 0	0.327549	0.311316	0.298083
	23.6995	17.1577	19.4422			0.310741	0.27158	0.300573
	25.1901	17.9111	19.4422			0.381772	0.288262	0.372622
Day 2	71.9764	26.0242	117.386		Day 2	0.374607	0.218008	0.557657
	73.7439	33.3539	121.357			0.351464	0.228055	0.653587
	81.5974	35.6242	119.77			0.313047	0.244253	0.641468
Day 3	95.3912	75.6596	108.167		Day 3	1.14694	0.730244	1.19785
	93.0404	72.0762	111.054			1.04811	0.822707	1.22727
	95.1271	71.3802	111.285			1.18327	0.688941	1.5545

## Sheet: Figure 3D
	Glut1					Glut 3					Gpd2
	WT	let-7Tg	Lin28Tg			WT	let-7Tg	Lin28Tg			WT	let-7Tg	Lin28Tg
Naïve	4.97875	4.47468	6.1922		Naïve	1.51759	1.65724	1.29725		Naïve	0.701144	0.500966	0.388356
	4.86279	4.58139	5.16029			1.86449	1.82739	1.93516			0.537667	0.555471	0.273659
	4.96496	4.08344	5.13531			1.83119	1.63897	2.10155			0.580668	0.58107	0.460238
Activated	30.3393	26.0844	51.1425		Activated	10.3684	5.59104	13.2641		Activated	1.38811	1.03822	2.1457
	32.5169	25.336	51.1779			10.8688	4.98335	14.069			1.21935	1.00564	1.92713
	31.4528	27.3623	49.8821			12.6592	5.32624	14.4145			0.987681	1.1893	1.94592
	Pfk1					Hk2					Tpi
	WT	let-7Tg	Lin28Tg			WT	let-7Tg	Lin28Tg			WT	let-7Tg	Lin28Tg
Naïve	0.0332797	0.0262013	0.0250934		Naïve	0.200654	0.117912	0.155012		Naïve	6.24102	5.99095	7.30787
	0.036671	0.0350555	0.0218451			0.0381753	0.0550843	0			6.45664	6.41204	7.66588
	0.0287715	0.0270878	0.0174752			0.14987	0.102223	0.0978998			6.88656	5.63644	8.33655
Activated	0.378435	0.314715	0.644142		Activated	7.03776	4.49748	14.1179		Activated	333.402	254.958	455.861
	0.480337	0.302523	0.630449			7.41331	4.46332	16.4778			331.788	243.389	454.284
	0.361012	0.329447	0.670101			10.3397	4.18758	16.5579			370.189	269.495	458.714
	Pkm					Ldha					Yars
	WT	let-7Tg	Lin28Tg			WT	let-7Tg	Lin28Tg			WT	let-7Tg	Lin28Tg
Naïve	55.4757	52.4832	62.399		Naïve	436.584	264.988	452.922		Naïve	70.1377	55.7069	78.636
	50.2407	51.7607	65.4105			476.099	269.247	433.569			79.3478	50.2407	88.5314
	53.2158	52.995	68.2829			439.317	288.371	460.839			70.2837	53.1422	82.947
Activated	696.084	581.694	765.602		Activated	5081.78	2997.31	5667.32		Activated	236.405	131.275	246.33
	696.566	577.276	761.897			5217.41	2927.49	5357.9			238.215	126.891	266.955
	700.926	585.334	819.415			5733.17	3192.45	6141.82			229.941	138.089	262.55

## Sheet: Figure 3- FS1B
	let-7a	let-7b	let-7c	let-7d	let-7e	let-7f	let-7g	let-7i
WT Day 0	0.0835723	0.0210822	0.0802792	0.0403907	0.202946	0.0496236	0.414996	0.10711
	0.0861537	0.0228772	0.0812244	0.0405278	0.210378	0.0549041	0.395036	0.108898
	0.0828602	0.0230167	0.0794298	0.0398527	0.196939	0.0494743	0.415472	0.112955
let-7Tg Day 0	0.0374775	0.0155944	0.0645325	0.0260995	0.121175	0.0276643	1.3418	0.0771158
	0.0416095	0.0176163	0.0632433	0.0262244	0.136603	0.0289369	1.29959	0.0806633
	0.0453996	0.0179338	0.0657814	0.0260933	0.134981	0.0289323	1.39941	0.0832055
Lin28Tg Day 0	0.000402842	0.00673318	0.040879	0.000106011	0.0118375	0.00010085	0.000428476	0.000323601
	0.00040477	0.00586924	0.0424936	0.000106814	0.0121272	0.000117699	0.000439268	0.000309321
	0.000404424	0.00642609	0.0439241	9.1883e-05	0.0123372	0.000103302	0.000417238	0.000307987
WT Day 5	0.00143291	0.00284012	0.0128701	0.0445685	0.0979485	0.0331044	0.174605	0.154231
	0.0015399	0.0028008	0.012648	0.0454699	0.100207	0.0347235	0.179251	0.150002
	0.00150588	0.00317247	0.0130466	0.0457153	0.0986746	0.0344064	0.173839	0.150812
let-7Tg Day 5	0.0437927	0.00343336	0.0135069	0.034646	0.0990867	0.0293364	1.7973	0.111478
	0.0432764	0.00376202	0.0145456	0.0354695	0.0975119	0.0293748	1.76262	0.109631
	0.043661	0.00370963	0.0143033	0.035024	0.0975638	0.0293497	1.78818	0.113086
Lin28Tg Day 5	0.00579826	0.000752426	0.00493695	0.000515348	0.0188909	0.00267701	0.00523657	0.00120716
	0.00584218	0.000700525	0.00496402	0.000488188	0.01812	0.00250795	0.00549648	0.00107737
	0.00564226	0.000706751	0.00444837	0.000426103	0.0182937	0.00240207	0.00512401	0.0010757
