# Supplementary material for: Modulation of let-7 miRNAs controls the differentiation of effector CD8 T cells
Source: eLife journal article supplement (doi:10.7554/elife.26398), 2017-07-24
Supplement: supp [file elife-26398-supp-v1.zip › elife_poa_e26398_Figure_4_Source_Data_1.xlsx]

## Sheet: Figure 4A
	% target lysis (gp33)					% target lysis (np396)
	WT	let-7Tg	Lin28Tg			WT	let-7Tg	Lin28Tg
5:1	38.0926	19.9867	81.7113		5:1	-7.54308	-11.1946	-0.655136
	32.8803	20.9715	80.5524			-3.5303	-14.0885	-2.53662
	37.5464	19.3143	81.5997			-7.93585	-19.5723	-7.84
1:1	27.068	13.9167	68.0914		1:1	-10.3821	-11.6995	-5.16006
	30.8417	16.9155	69.4097			-16.0653	-11.6417	-3.74476
	32.2441	12.8319	70.7021			-7.78689	-4.88577	-3.62085
1:5	10.2655	0.538516	39.6798		1:5	-7.95065	-12.0271	-2.96756
	14.5033	5.34599	47.4379			-9.10973	-16.3048	-6.9233
	11.071	-0.0462348	41.4242			-11.5344	-7.23036	-11.5697
1:25	4.84519	-1.25317	34.4653		1:25	-6.19805	-10.008	-1.48903
	2.03779	-3.1118	29.5629			-10.6105	-3.18881	-6.18103
	9.70416	0.725604	29.7907			-7.15636	-3.42155	-5.71927

## Sheet: Figure 4B
	% target lysis (gp33)						% target lysis (np396)
	WT	WT+Dox	4Tg	4Tg+Dox			WT	WT+Dox	4Tg	4Tg+Dox
10:1	39.9483	31.8265	78.5176	35.9836		10:1	11.6576	7.66335	-2.9667	9.42104
	38.1478	33.5768	78.4023	30.1533			5.53382	3.94983	1.30017	4.35104
2:1	34.4054	28.4672	72.3743	35.485		2:1	6.94965	4.93585	4.96105	5.17735
	42.0029	29.5209	71.9223	35.6632			9.37516	2.60037	2.12059	9.41603
2:5	35.5644	24.1709	47.3491	25.7894		2:5	7.34817	-26.4614	3.45811	8.01366
	32.7113	26.0905	49.7608	26.1648			0	-9.49347	5.0451	97.8963

## Sheet: Figure 4C
Granulation (SSC-A)
WT	let-7Tg	Lin28Tg
0.962121	0.905303	1.25
1.08333	0.973485	1.35606
0.954545	0.814394	1.29167

## Sheet: Figure 4E
	Gzmb					Gzma					Prf1
	WT	let-7Tg	Lin28Tg			WT	let-7Tg	Lin28Tg			WT	let-7Tg	Lin28Tg
Naïve	0.0354956	0	0.107206		Naïve	0.124262	0.0423288	0.653286		Naïve	2.52005	8.6505	12.7443
	0.0185528	0	0.139511			0.0998878	0.0547038	0.645185			9.31433	8.94935	12.4648
	0.0382018	0.0233427	0.121367			0.103195	0.123432	0.648772			9.72333	9.4859	12.8775
Effector	916.581	659.601	1811.69		Effector	367.122	13.6527	2188.59		Effector	14.0268	4.54449	115.423
	921.677	881.277	1988.02			418.22	15.8798	1937.24			13.8241	5.99649	115.343
	1137.08	1118.58	2934.95			380.596	16.417	2040.61			13.344	5.25655	125.521

## Sheet: Figure 4F
Gzmb				Gzma				Ifng
WT	let-7Tg	Lin28Tg		WT	let-7Tg	Lin28Tg		WT	let-7Tg	Lin28Tg
1.52563	0.504	2.112		1.03763	0.533333	17.2581		1.36813	0.250904	1.62349
0.905614	0.566038	1.60647		0.962366	0.425269	32.043		1.01374	0.338618	1.89024
0.568755	0.519313	2.7382						0.618132	0.246667	2.66

## Sheet: Figure 4- FS1
Prf1					Gzma					Gzmb
WT	WT+Dox	4Tg	4Tg+Dox		WT	WT+Dox	4Tg	4Tg+Dox		WT	WT+Dox	4Tg	4Tg+Dox
0.900565	0.807334	28.3361	3.16946		1.02747	0.246005	23.9081	0.729557		0.976554	0.617469	3.10826	1.0964
1.0799	0.854551	25.8407	3.24954		1.11272	0.248748	23.9081	0.727033		1.00401	0.648617	3.25376	1.10402
1.01953	0.879185	27.1066	3.27442		0.859812	0.246517	26.2715	0.76902		1.01944	0.648617	3.247	1.10632
