# Supplementary material for: Modulation of let-7 miRNAs controls the differentiation of effector CD8 T cells
Source: eLife journal article supplement (doi:10.7554/elife.26398), 2017-07-24
Supplement: supp [file elife-26398-supp-v1.zip › elife_poa_e26398_Figure_5_Source_Data_1.xlsx]

## Sheet: Figure 5A
	Eomes					Tbx21
	WT	let-7Tg	Lin28Tg			WT	let-7Tg	Lin28Tg
Naïve	2.09573	0.950516	3.83205		Naïve	2.09573	0.950516	3.83205
	2.25238	1.01311	3.25378			2.25238	1.01311	3.25378
	1.59047	1.18492	3.74021			1.59047	1.18492	3.74021
Effector	18.019	9.90244	34.65		Effector	18.019	9.90244	34.65
	18.5513	10.1105	30.8412			18.5513	10.1105	30.8412
	20.2444	10.1316	34.4107			20.2444	10.1316	34.4107

## Sheet: Figure 5B
Eomes				T-bet
WT	let-7Tg	Lin28Tg		WT	let-7Tg	Lin28Tg
0.828097	0.36748	1.62602		1.19795	1.19373	0.826211
0.982944	0.665753	2.80822		0.928328	1.16176	0.838235
1.18896	0.603624	2.21971		0.87372	0.945312	0.699219

## Sheet: Figure 5C
Eomes
WT	WT+Dox	4Tg	4Tg+Dox
0.93609	0.576498	2.36044	0.36519
1.01658	0.623035	2.24864	0.357179
1.04733	0.649943	2.39173	0.374677

## Sheet: Figure 5E
Firefly-luciferase activity
Vector alone	WT	MUT
4.70949	2.3205	3.97204
3.79432	2.27255	3.33861
3.75976	2.32552	3.46133

## Sheet: Figure 5- FS1A
	Hes1					Hey1
	WT	let-7Tg	Lin28Tg			WT	let-7Tg	Lin28Tg
Naïve	0	0	0		Naïve	0.0388067	0.0258168	0.217253
	0	0	0			0.024458	0.175367	0.388087
	0	0	0			0.0637006	0.0606836	0.406817
Effector	0	0	0		Effector	0	0	0
	0	0	0.0281404			0	0	0
	0.0572776	0	0.0114127			0.180381	0	0
	Heyl					Dtx1
	WT	let-7Tg	Lin28Tg			WT	let-7Tg	Lin28Tg
Naïve	0	0	0		Naïve	37.1284	73.2345	114.203
	0	0	0			41.5406	69.4764	103.211
	0	0	0			41.9166	92.1205	124.366
Effector	0	0	0		Effector	13.959	1.92579	0.176383
	0	0	0			12.3473	2.68041	0.342882
	0	0	0			9.22864	2.13532	0.0843063

## Sheet: Figure 5- FS1B
	Zbtb32					Prdm1					Runx3d
	WT	let-7Tg	Lin28Tg			WT	let-7Tg	Lin28Tg			WT	let-7Tg	Lin28Tg
Naïve	0.351708	0.347427	0.326039		Naïve	0.0131188	0.000204225	0.0152764		Naïve	5.8204	8.09175	4.86279
	0	0.36546	0.261905			0.00298259	0	0.00762235			7.02315	8.59472	4.99604
	0.374607	0.284162	0.339414			0.00737973	0	0.008113			5.74823	8.47639	4.67117
Effector	42.14	40.912	57.5782		Effector	0.332429	0.827473	1.11764		Effector	30.6777	10.4501	17.281
	43.0254	41.8006	53.3513			0.351627	1.20062	0.84408			26.8922	10.4719	15.9128
	24.5409	42.7974	52.5803			0.382921	1.1094	0.994092			29.043	8.33655	15.5961

## Sheet: Figure 5- FS2A
NIH 3T3
let-7a	let-7b	let-7c	let-7d	let-7e	let-7f	let-7g	let-7i
116.764	5.57685	225.261	64.2868	278.291	57.5782	81.5974	153.964
136.566	6.40612	224.637	64.9587	270.869	58.0994	80.029	148.102
121.976	6.05216	237.116	64.4206	274.46	60.1066	79.2012	143.156

## Sheet: Figure 5- FS2B
3T3
Empty vector	let-7b	let-7b (mut)	let-7g	let-7g (mut)	let-7i	let-7i (mut)
3.58834	0.153468	3.33472	0.259031	2.24418	0.377217	1.64404
2.54927	0.158387	2.97372	0.266413	2.5041	0.274186	1.78753
3.52995	0.167841	1.86283	0.2409	2.60574	0.27005	1.90361
2.93521	0.131751	2.81951	0.31009	2.61187	0.359732	1.66292
