# Supplementary material for: Modulation of let-7 miRNAs controls the differentiation of effector CD8 T cells
Source: eLife journal article supplement (doi:10.7554/elife.26398), 2017-07-24
Supplement: supp [file elife-26398-supp-v1.zip › elife_poa_e26398_Figure_6_figure_supplement_1.pdf]

Granzyme B

n.s.

n.s.

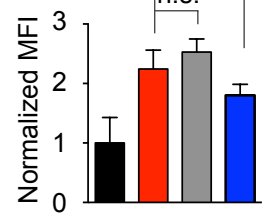

P14+ CTLs:

■ *CD4Cre-Eomes<sup>fl/wt</sup>*

■ *CD4Cre-Eomes<sup>wt</sup>Lin28Tg*

■ *CD4Cre<sup>+</sup>Eomes<sup>fl/wt</sup>Lin28Tg*

■ *CD4Cre<sup>+</sup>Eomes<sup>fl/fl</sup>Lin28Tg*
