# Supplementary material for: Modulation of let-7 miRNAs controls the differentiation of effector CD8 T cells
Source: eLife journal article supplement (doi:10.7554/elife.26398), 2017-07-24
Supplement: supp [file elife-26398-supp-v1.zip › elife_poa_e26398_Figure_6_Source_Data_1.xlsx]

## Sheet: Figure 6A
Eomes (mRNA)
CD4Cre-Eomes(fl/wt)		CD4Cre-Eomes(wt)Lin28Tg			CD4Cre+Eomes(fl/wt)Lin28Tg			CD4Cre+Eomes(fl/fl)Lin28Tg
0.958106		1.36408			0.725103			0.138689
0.943606		1.37356			0.816915			0.147412
1.09829		1.6414			0.913361			0.171339
Eomes (protein)
CD4Cre-Eomes(fl/wt)		CD4Cre-Eomes(wt)Lin28Tg			CD4Cre+Eomes(fl/wt)Lin28Tg			CD4Cre+Eomes(fl/fl)Lin28Tg
1.20307		1.64334			0.766212			0.149659
0.796928		1.17406			0.769625			0.145904

## Sheet: Figure 6B
Gzma
CD4Cre-Eomes(fl/wt)		CD4Cre-Eomes(wt)Lin28Tg			CD4Cre+Eomes(fl/wt)Lin28Tg			CD4Cre+Eomes(fl/fl)Lin28Tg
0.959946		16.7919			11.1324			7.2068
1.00907		17.2042			10.8355			7.36333
1.03099		18.2357			10.9867			7.23183
Prf1
CD4Cre-Eomes(fl/wt)		CD4Cre-Eomes(wt)Lin28Tg			CD4Cre+Eomes(fl/wt)Lin28Tg			CD4Cre+Eomes(fl/fl)Lin28Tg
0.964722		6.70785			2.37487			1.26973
1.00988		6.34602			2.28921			1.33378
1.0254		6.93479			2.20817			1.25051

## Sheet: Figure 6D
	Cytotoxicity (gp33)
	CD4Cre-Eomes(fl/wt)		CD4Cre-Eomes(wt)Lin28Tg			CD4Cre+Eomes(fl/wt)Lin28Tg			CD4Cre+Eomes(fl/fl)Lin28Tg
1:1	34.1866		58.584			46.5987			40.3161
	33.3339		57.3153			45.674			40.632
	34.0016		58.6839			43.3911			42.4635
1:5	24.4835		51.8076			40.8331			20.6637
	22.9619		48.5667			37.6237			22.3555
	22.6115		50.7964			34.6522			21.613
1:25	8.23825		23.3287			13.5642			8.87023
	9.38252		24.2836			11.8413			6.28582
	7.53108		19.6297			9.9362			10.7606
	Cytotoxicity (np396)
	CD4Cre-Eomes(fl/wt)		CD4Cre-Eomes(wt)Lin28Tg			CD4Cre+Eomes(fl/wt)Lin28Tg			CD4Cre+Eomes(fl/fl)Lin28Tg
1:1	4.20345		7.44295			9.68604			11.688
	8.74291		7.35927			10.7486			3.56741
	6.35915		9.08549			8.6361			4.29665
1:5	6.03653		9.95639			5.69098			8.44695
	7.77351		10.4722			6.47133			8.93766
	8.5516		1.85122			9.05926			8.48585
1:25	7.89577		13.7104			4.37346			7.11389
	9.35089		5.04299			3.41873			2.19877
	6.40995		7.78011			8.25782			3.51754

## Sheet: Figure 6- FS1
Granzyme B
CD4Cre-Eomes(fl/wt)		CD4Cre-Eomes(wt)Lin28Tg			CD4Cre+Eomes(fl/wt)Lin28Tg			CD4Cre+Eomes(fl/fl)Lin28Tg
1.30241		2.62887			3.08935			2.17526
0.697595		1.72165			1.87285			1.34708

## Sheet: Figure 6- FS2A
P14+CD4Cre+Eomes(fl/fl)Lin28Tg CTLs:
	Cytotoxicity (gp33)
	RV- Empty	RV-Eomes
1:1	50.1935	83.5833
	46.3996	78.9197
	47.3829	82.98
1:5	32.4789	67.3937
	33.3443	60.8124
	32.1886	63.9029
	Cytotoxicity (np396)
	RV- Empty	RV-Eomes
1:1	3.81166	-3.04116
	-1.61353	1.4413
	-2.8507	0.63967
1:5	-2.62613	-2.62613
	-1.80066	1.83994
	-3.45773	-0.981247

## Sheet: Figure 6- FS2B
P14+CD4Cre+Eomes(fl/fl)Lin28Tg CTLs:
Eomes			Gzma			Gzmb			Prf1
RV- Empty	RV-Eomes		RV- Empty	RV-Eomes		RV- Empty	RV-Eomes		RV- Empty	RV-Eomes
0.503574	1232.42		0.954831	1.95927		1.04573	0.78432		0.965828	114.868
0.944271	1129.35		0.938428	2.03541		0.843532	0.769778		1.06499	125.961
1.55216	1373.15		1.10674	2.14699		1.11073	0.883631		0.969182	111.187

## Sheet: Figure 6- FS2C
P14+let-7Tg CTLs:
	Cytotoxicity (gp33)
	RV- Empty	RV-EomesMUT
1:1	35.7844	55.0296
	33.5764	49.7947
	40.0307	55.7635
1:5	20.7971	40.0301
	18.7464	33.837
	17.7267	34.7475
	Cytotoxicity (np396)
	RV- Empty	RV-EomesMUT
1:1	-0.618921	2.925
	-1.25174	1.4982
	1.91069	1.92399
1:5	-0.884242	-2.21605
	-0.496065	-0.791725
	0.833948	-1.37545

## Sheet: Figure 6- FS2D
P14+let-7Tg CTLs:
Eomes			Gzma			Gzmb			Prf1
RV- Empty	RV-EomesMUT		RV- Empty	RV-EomesMUT		RV- Empty	RV-EomesMUT		RV- Empty	RV-EomesMUT
0.901159	4.31548		1.10576	2.28423		0.935846	0.936278		1.08358	1.42847
0.964501	4.42759		0.956637	2.28265		0.871362	0.933039		1.03872	1.55129
1.13434	4.64771		0.9376	2.24967		1.19279	0.963935		0.877703	1.5257
