# Supplementary material for: Modulation of let-7 miRNAs controls the differentiation of effector CD8 T cells
Source: eLife journal article supplement (doi:10.7554/elife.26398), 2017-07-24
Supplement: supp [file elife-26398-supp-v1.zip › elife_poa_e26398_Supplementary_File_1.xlsx]

## Sheet: Sheet1
SEARCH SEQUENCE = TACTACCTC
WE searched 3'UTRs and ORFs independently and found a sequence in a coding portion of EOMES that matches the 9-bp seed, in both mouse and human.
MOUSE 3'UTR	67 genes		MOUSE ORF	119 genes			HUMAN 3'UTR	74 genes		HUMAN ORF	159 genes
3'UTR
Eef2k(+)	1		Dcc(-)	1			TRMT10A(-)	1		XPC(-)	1
Pard6b(+)	2		Cabin1(-)	2			EPC2(+)	2		ASXL1(+)	2
Il1f5(+)	3		Fut8(+)	3			RGPD6(-)	3		LOC101060026(+)	3
Gpr156(+)	4		Cdhr2(+)	4			C11orf57(+)	4		NMUR2(-)	4
Trpc6(+)	5		Dscam(-)	5			PBX3(+)	5		SCAMP5(+)	5
Rdx(+)	6		Lynx1(-)	6			RANBP2(+)	6		SAMD12(-)	6
Chrnb2(-)	7		Neurl4(+)	7			SLFN14(-)	7		SLC6A4(-)	7
Adrb3(-)	8		Olfr115(-)	8			EEF2K(+)	8		LOC102724459(+)	8
Chrm1(+)	9		Tnc(-)	9			FAM104A(-)	9		LL0XNC01-116E7.2(-)	9
Hmga2(-)	10		Akt2-ps(+)	10			SFMBT1(-)	10		ASS1P6(-)	10
Dot1l(+)	11		Ugt2b37(-)	11			DPP3(+)	11		SLC13A1(-)	11
Zbtb39(+)	12		Wdr73(-)	12			LRIG2(+)	12		PISD(-)	12
Myocd(-)	13		Ccnjl(+)	13			MAP4K3(-)	13		TMTC4(-)	13
Fndc7(-)	14		Esrp1(-)	14			CCDC93(-)	14		DSCAML1(-)	14
Cpd(-)	15		Nlrp4a(+)	15			PARM1(+)	15		ART4(-)	15
Sarm1(-)	16		Myo1f(+)	16			PPP1R15B(-)	16		ASTE1(-)	16
Sfmbt1(+)	17		Scamp5(-)	17			ICOS(+)	17		SLC52A3(-)	17
1600012H06Rik(+)	18		Nr1h5(-)	18			ODF2L(-)	18		CACNB2(+)	18
Ankzf1(+)	19		Slc48a1(+)	19			ACER2(+)	19		SPATC1L(-)	19		HUMAN GENOME MATCH TO EOMES
Mecp2(-)	20		LOC105244134(+)	20			PPP1R12B(+)	20		EOMES(-)	20
Ccdc127(+)	21		Nsun3(-)	21			TSPAN18(+)	21		NUP153(-)	21
Nod2(+)	22		Rasip1(+)	22			RGPD5(+)	22		LOC105379252(-)	22
Abcb9(-)	23		Lmbr1l(-)	23			SMARCAD1(+)	23		XXYLT1(-)	23
B3galt5(+)	24		Gm5486(-)	24			HMGA2(+)	24		BTBD16(+)	24
Phf14(+)	25		Sh3tc1(-)	25			ALDH1L2(-)	25		LOC645485(+)	25
Pbx1(-)	26		Lrrc42(-)	26			ABCB9(-)	26		NUP214(+)	26
Sall3(-)	27		Ptchd4(+)	27			ZNF341(+)	27		SLC38A8(-)	27
Tdrkh(+)	28		Epb4.1l3(+)	28			HDX(-)	28		EGR1(+)	28
Alox5(-)	29		Art4(-)	29			SOCS4(+)	29		XIRP2(+)	29
Tspan13(-)	30		Slc6a4(+)	30			KIAA1598(-)	30		ALDH1L2(-)	30
Slc7a11(-)	31		Fbn2(-)	31			SUOX(+)	31		DUSP7(-)	31
Lrig2(-)	32		Arap2(-)	32			FAM178A(+)	32		ATP10B(-)	32
Trp53bp1(-)	33		Phka2(+)	33			APBA1(-)	33		MYO15B(+)	33
Pbx3(-)	34		Adamts12(+)	34			FNIP1(-)	34		WBP11P1(+)	34
Zcchc3(-)	35		Hmbs(-)	35			CABP7(+)	35		LOC100996731(+)	35
Intu(+)	36		Sucnr1(+)	36			MECP2(-)	36		PTPRK(-)	36		MOUSE GENOME MATCH TO EOMES
Clpb(+)	37		Gbp2(+)	37			LOC105370554(+)	37		FBN2(-)	37
Pced1b(+)	38		Sel1l3(-)	38			EZH1(-)	38		MARCH7(+)	38
Ltn1(-)	39		Inpp5f(+)	39			RDX(-)	39		MUC3A(+)	39
Prps1(+)	40		Dscaml1(+)	40			ZBTB39(-)	40		DPCR1(+)	40
Cacnb4(-)	41		LOC102635410(+)	41			ARHGEF15(+)	41		CACNA1D(+)	41
Tmprss2(-)	42		Olfr112(-)	42			POLR3E(+)	42		UBR4(-)	42
Grpel2(-)	43		Ankzf1(+)	43			TFEC(-)	43		DPP3P2(-)	43
Ccdc93(+)	44		LOC105245460(+)	44			USP15(+)	44		SLC7A2(+)	44
Bloc1s6(+)	45		Dmgdh(+)	45			ZNF557(+)	45		IDE(-)	45
Spag11b(+)	46		Ide(-)	46			PCDH19(-)	46		PAPLN(+)	46
Sub1(-)	47		Ptchd3(+)	47			LOC105373780(-)	47		CUL4B(-)	47
Map4k3(-)	48		Pfkfb1(-)	48			EIF2S2(-)	48		FAT1(-)	48
Nme4(-)	49		Med12l(+)	49			CTPS2(-)	49		AKR1A1(+)	49
Pcdh19(-)	50		Olfr156(-)	50			LRIG3(-)	50		LOC100996724(-)	50
Ezh2(-)	51		Slc7a2(+)	51			CNIH4(+)	51		EPB41L3(-)	51
Cers3(+)	52		Tnrc18(-)	52			IFT80(-)	52		LOC105373780(-)	52
Fasl(-)	53		D630003M21Rik(-)	53			C12orf49(-)	53		SMARCAD1(+)	53
Prtg(+)	54		Slc37a2(-)	54			TRIM32(+)	54		CCNJL(-)	54
Fnip1(+)	55		Efhc1(+)	55			SNX16(-)	55		RB1CC1(-)	55
Tmprss11f(-)	56		Cacna2d2(+)	56			PRTG(-)	56		ATP8B3(-)	56
Map3k1(-)	57		Taf6(-)	57			ZNF516(-)	57		UBE2V1P3(-)	57
Gm5878(-)	58		Gls2(+)	58			COL6A6(+)	58		LOC401478(-)	58
AU019823(-)	59		Esco2(-)	59			RGPD8(-)	59		RTN4IP1(-)	59
Klf8(-)	60		G2e3(+)	60			BAG1(-)	60		PCDHGB3(+)	60
Apba1(+)	61		Slc6a2(+)	61			TEAD3(-)	61		CNNM2(+)	61
Limk2(-)	62		Xkr8(-)	62			CACNB4(-)	62		PTCHD4(-)	62
Mief1(+)	63		Acadl(-)	63			ZCCHC9(+)	63		TRAPPC12(+)	63
Ncoa3(+)	64		Plxna1(-)	64			LTN1(-)	64		TULP2(-)	64
Zfp607(+)	65		Lama1(+)	65			C3orf38(+)	65		GNAT1(+)	65
Yod1(+)	66		Ptpn3(-)	66			GDAP2(-)	66		LOC729040(-)	66
Clec14a(-)	67		Wdfy3(-)	67			GPR156(-)	67		VRTN(+)	67
			Ube2o(-)	68			MAP3K1(+)	68		MAP4K3(-)	68
			Igf2r(-)	69			TRMT1L(-)	69		SLC6A2(+)	69
			Tcaf3(-)	70			RALY(+)	70		ZNF579(-)	70
			Zfhx2(-)	71			YOD1(-)	71		SLC16A13(+)	71
			Dsg1c(+)	72			ZNF605(-)	72		SALL4P3(+)	72
			Gm7814(+)	73			KCNV1(-)	73		LOC388996(+)	73
			Mthfr(+)	74			ZNF555(+)	74		SYVN1(-)	74
			Olfr114(-)	75						NUP54(-)	75
			Lace1(-)	76						CRYBG3(+)	76
			Hcar1(-)	77						ALMS1(+)	77
			Greb1(-)	78						PFKFB1(-)	78
			Etl4(+)	79						YOD1(-)	79
			Pisd-ps2(-)	80						RNF123(+)	80
			Cep76(-)	81						LOC105373602(-)	81
			Nup214(+)	82						TRRAP(+)	82
			Snrnp200(+)	83						ASS1P4(+)	83
			2210008F06Rik(+)	84						LOC102724365(+)	84
			Itgb2(+)	85						CNIH4(+)	85
			Apaf1(-)	86						PLK2(-)	86
			Daxx(+)	87						ECHDC3(+)	87
			Gm17847(-)	88						SCAMP3(-)	88
			Cyp2u1(-)	89						RDXP2(-)	89
			Aste1(+)	90						PIGU(-)	90
			Eomes(+)	91						HDX(-)	91
			Slc26a9(+)	92						SECISBP2L(-)	92
			Vmn2r76(-)	93						MTHFR(-)	93
			Sec63(+)	94						ZDHHC23(+)	94
			Rgsl1(-)	95						ATP2B3(+)	95
			Vps54(+)	96						ZNF341(+)	96
			Ptpre(+)	97						FUT8(+)	97
			Cyp4f39(+)	98						TIAM1(-)	98
			Plk2(+)	99						PTPN3(-)	99
			Sik1(-)	100						LRRC74A(+)	100
			Lct(-)	101						MIS18BP1(-)	101
			Klrg2(-)	102						VSTM4(-)	102
			Ttyh2(+)	103						THOC5(-)	103
			Zdhhc23(-)	104						DUSP9(+)	104
			Olfr116(-)	105						ZNF516(-)	105
			Gm7428(-)	106						ELFN1(+)	106
			Scamp3(+)	107						MUC12(+)	107
			Syvn1(+)	108						PRAC1(-)	108
			Pigh(-)	109						FRMD5(-)	109
			Kctd12b(+)	110						SLC48A1(+)	110
			Pigc(+)	111						USP4(-)	111
			Dusp7(+)	112						LOC100996736(+)	112
			Krt13(-)	113						MED12L(+)	113
			Piwil1(+)	114						PIWIL1(+)	114
			Tulp2(+)	115						PMPCAP1(-)	115
			Ace(+)	116						PRTG(-)	116
			Myo15b(+)	117						TSR1(-)	117
			Abhd12(-)	118						RASIP1(-)	118
			Ubox5(-)	119						OTOP1(-)	119
										CABIN1(+)	120
										PIGH(-)	121
										BCO2(+)	122
										SCNN1D(+)	123
										LOC100996737(-)	124
										TLR4(+)	125
										WBP1L(+)	126
										TNFRSF11A(+)	127
										CLCA3P(+)	128
										OIT3(+)	129
										C11orf57(+)	130
										POLQ(-)	131
										LACE1(+)	132
										PFKFB2(+)	133
										TNRC18(-)	134
										HMGCR(+)	135
										PHF19(-)	136
										SEC63(-)	137
										NMUR1(-)	138
										OTOG(+)	139
										BPTF(+)	140
										APAF1(+)	141
										MAP3K7(-)	142
										SIN3A(-)	143
										AXDND1(+)	144
										LOC100420759(-)	145
										PBX3(+)	146
										ESRP1(+)	147
										FER1L6(+)	148
										PLXNA1(+)	149
										MYO1F(-)	150
										DSCAM(-)	151
										ERAP2(+)	152
										OXER1(-)	153
										PTPRE(+)	154
										TMEM61(+)	155
										SLC37A2(+)	156
										LRRC42(+)	157
										PDE4DIP(+)	158
										RGS3(+)	159
