# Supplementary material for: Modulation of let-7 miRNAs controls the differentiation of effector CD8 T cells
Source: eLife journal article supplement (doi:10.7554/elife.26398), 2017-07-24
Supplement: supp [file elife-26398-supp-v1.zip › elife_poa_e26398_Supplementary_File_2.xlsx]

## Sheet: Sheet1
SYBR primers	Forward	Reverse
Cdc25a	ACAGCAGTCTACAGAGAATGGG	GATGAGGTGAAAGGTGTCTTGG
Ccnd2	GAGTGGGAACTGGTAGTGTTG	CGCACAGAGCGATGAAGGT
Ccnf	GTAGGCGATAGGTCATACGGA	ACAATGGATCACTACCCCGTG
Cdk6	GGCGTACCCACAGAAACCATA	AGGTAAGGGCCATCTGAAAACT
Glut1	CAGTTCGGCTATAACACTGGTG	GCCCCCGACAGAGAAGATG
Glut3	ATGGGGACAACGAAGGTGAC	GTCTCAGGTGCATTGATGACTC
Gpd2	GAAGGGGACTATTCTTGTGGGT	GGATGTCAAATTCGGGTGTGT
Pfk1	GGAGGCGAGAACATCAAGCC	CGGCCTTCCCTCGTAGTGA
Hk2	TGATCGCCTGCTTATTCACGG	AACCGCCTAGAAATCTCCAGA
Tpi	CCAGGAAGTTCTTCGTTGGGG	CAAAGTCGATGTAAGCGGTGG
Pkm	GCCGCCTGGACATTGACTC	CCATGAGAGAAATTCAGCCGAG
Myc	AGTGCTGCATGAGGAGACAC	GGTTTGCCTCTTCTCCACAG
Tfap4	GGAGAAGCTAGAGCGGGAAC	TTTTGCCGGGATGTAGAGAC
Zbtb32	CCCACTCCAGGATCTTTTCCC	TGACTCACACAGGTTGCCAG
Prdm1	GACGGGGGTACTTCTGTTCA	GGCATTCTTGGGAACTGTGT
Runx3d	GCGACATGCCTTCCAACAGC	CTTAGCGCGCCGCTGTTCTCGC
RPL13a	CGAGGCATGCTGCCCCACAA	AGCAGGGACCACCATCCGCT
IDT Taq Assay
Eomes	Mm.PT.58. 32833544
Tbx21	Mm.PT.58. 5261453
Gzma	Mm.PT.58. 43238753
Gmzb	Mm.PT.58. 42155916
Ifng	Mm.PT.58. 30096391
Prf1	Mm.PT.58. 41904164
Rpl13a	Mm.PT.58. 43547045.g
AB Taqman Assay
Hes1	Mm01342805_m1
Hey1	Mm00468865_m1
Heyl	Mm00516558_m1
Dtx1	Mm00492297_m1
Ldha	Mm01612132_g1
Yars	Mm00460301_m1
let-7a	377
let-7b	378
let-7c	379
let-7d	2283
let-7e	2406
let-7f	382
let-7g	2282
let-7i	2221
U6	1973
