# Supplementary figures and images for: Modulation of let-7 miRNAs controls the differentiation of effector CD8 T cells
Source: eLife journal article supplement (doi:10.7554/elife.26398), 2017-07-24

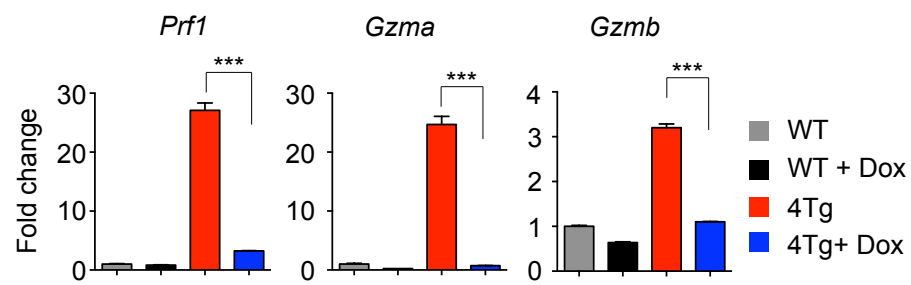

Figure 4- figure supplement 1

Supplement: supp [file elife-26398-supp-v1.zip]

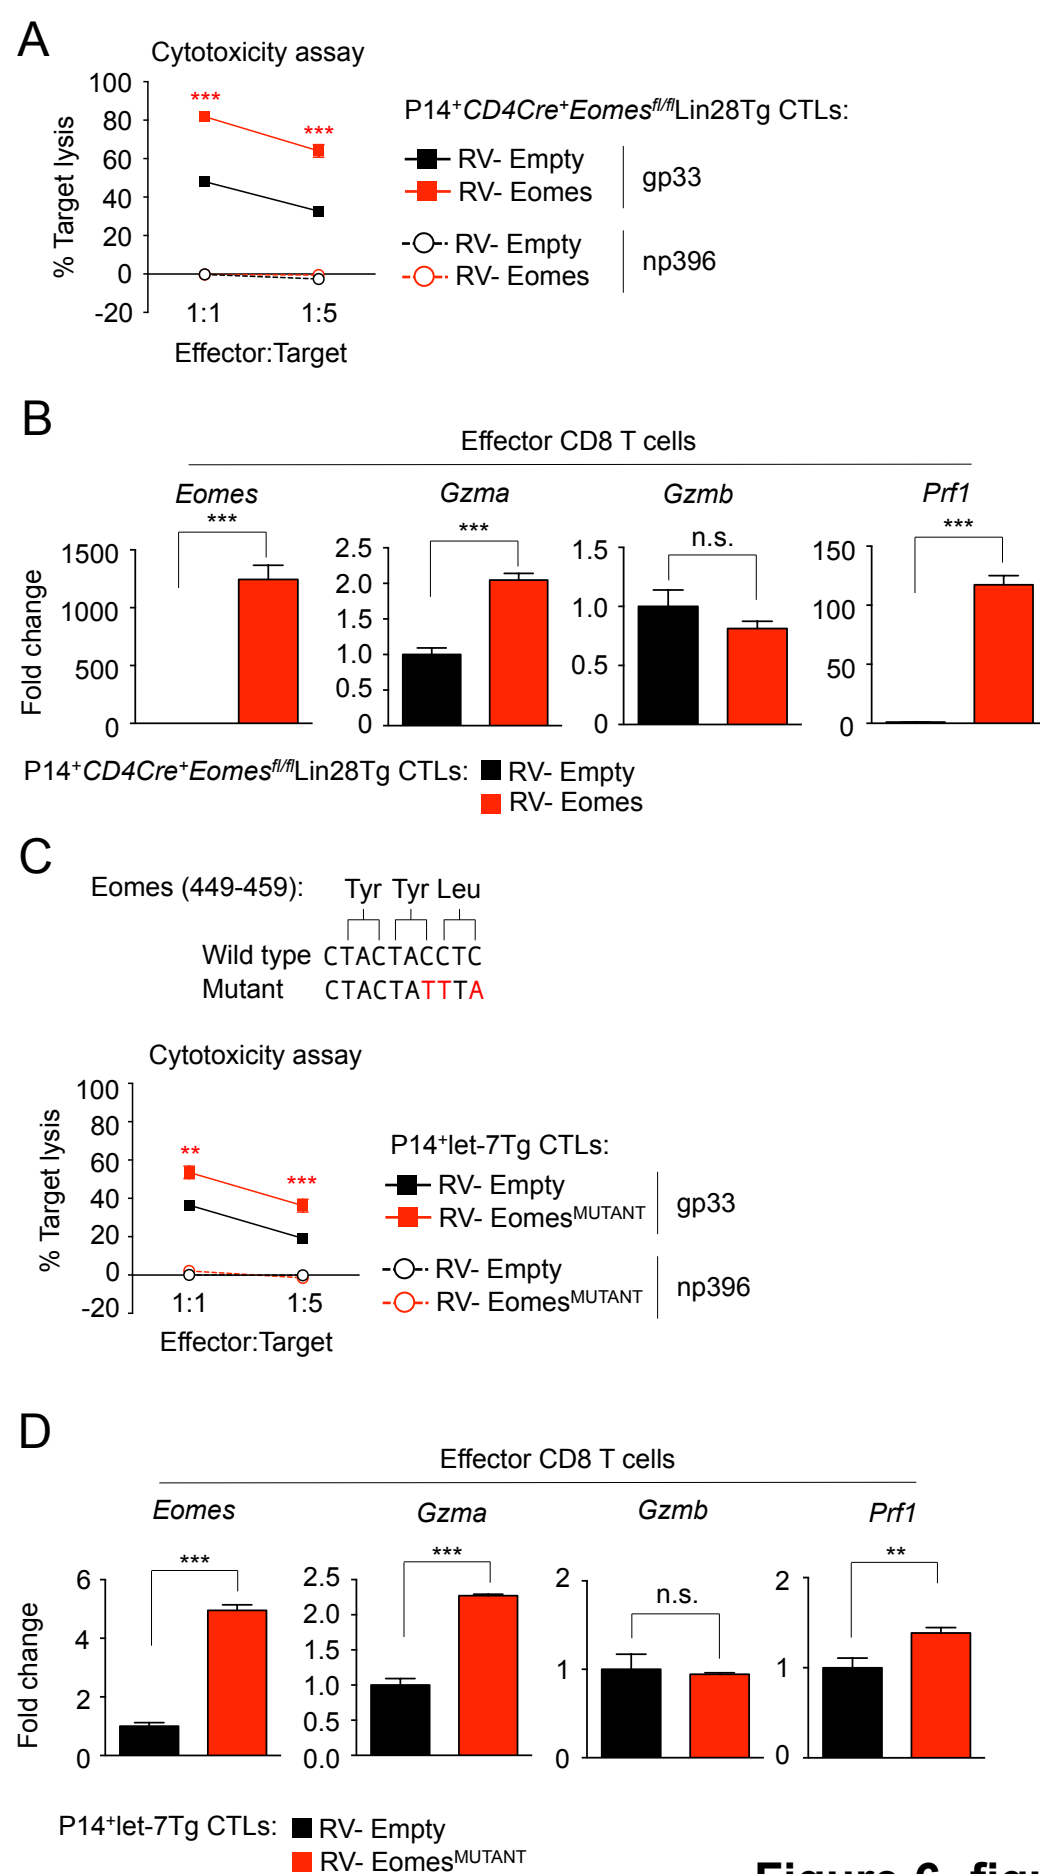

**Figure 6- figure supplement 2**

Supplement: supp [file elife-26398-supp-v1.zip]

**A**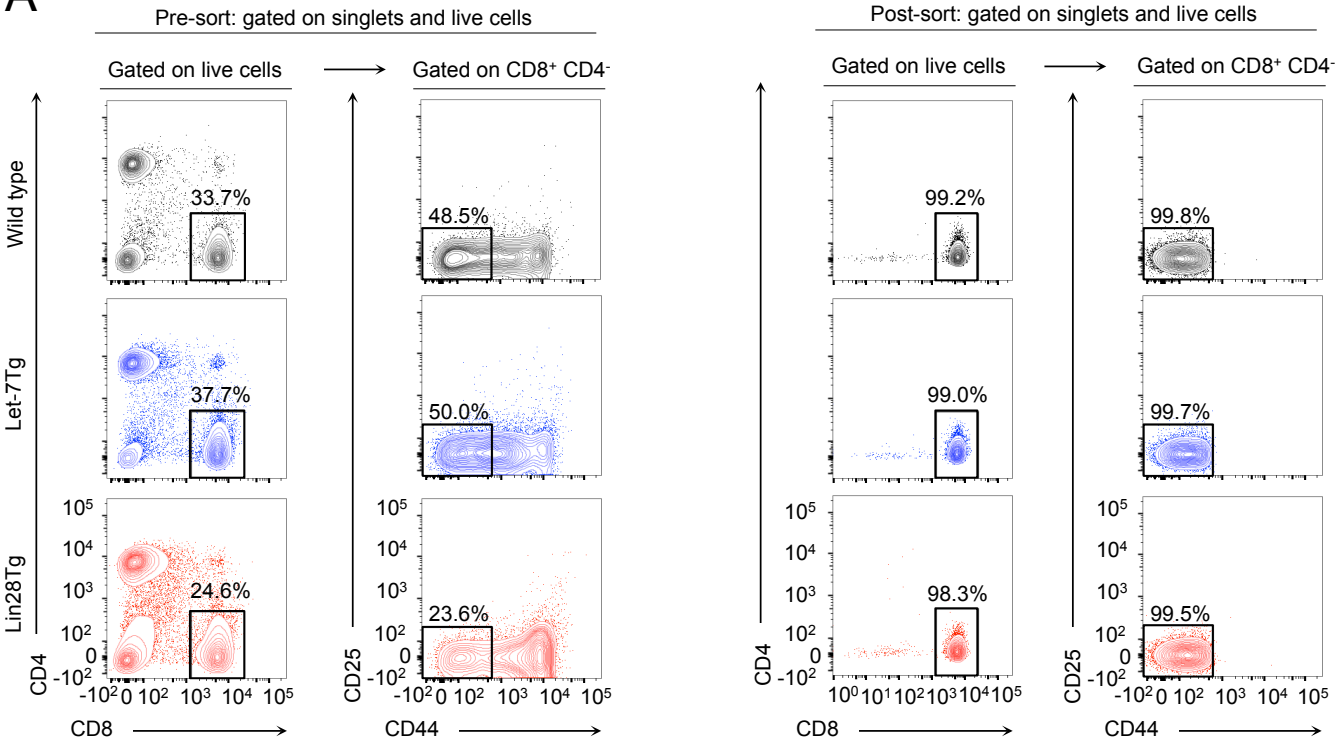**B**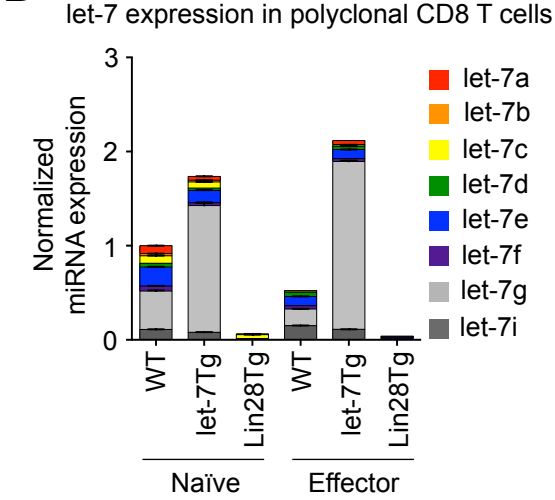

Figure 3- figure supplement 1

Supplement: supp [file elife-26398-supp-v1.zip]

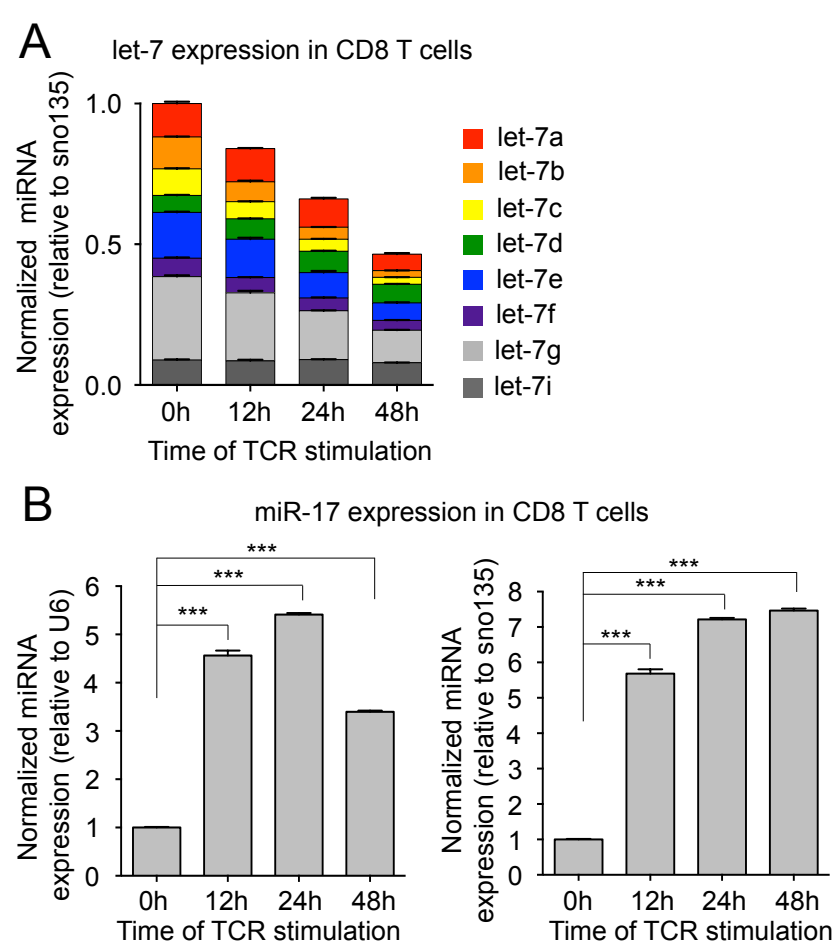

Figure 1- figure supplement 2

Supplement: supp [file elife-26398-supp-v1.zip]

**A**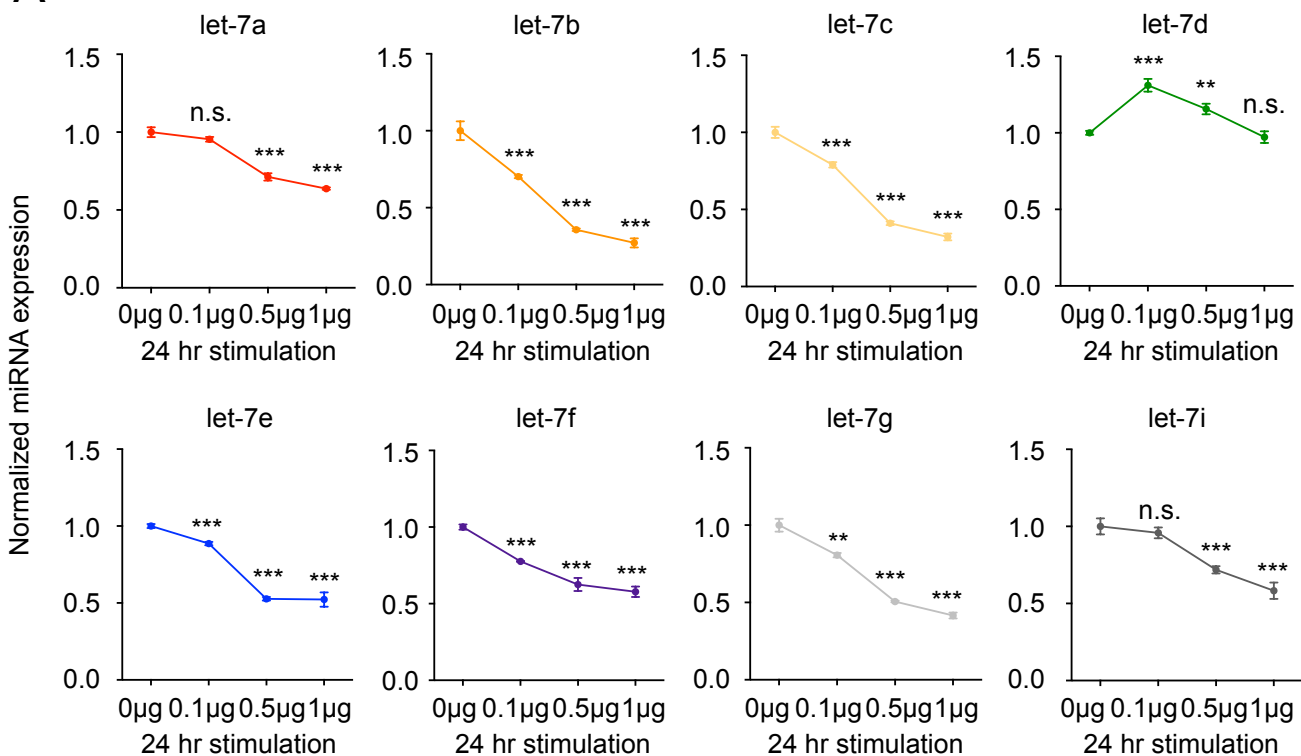**B**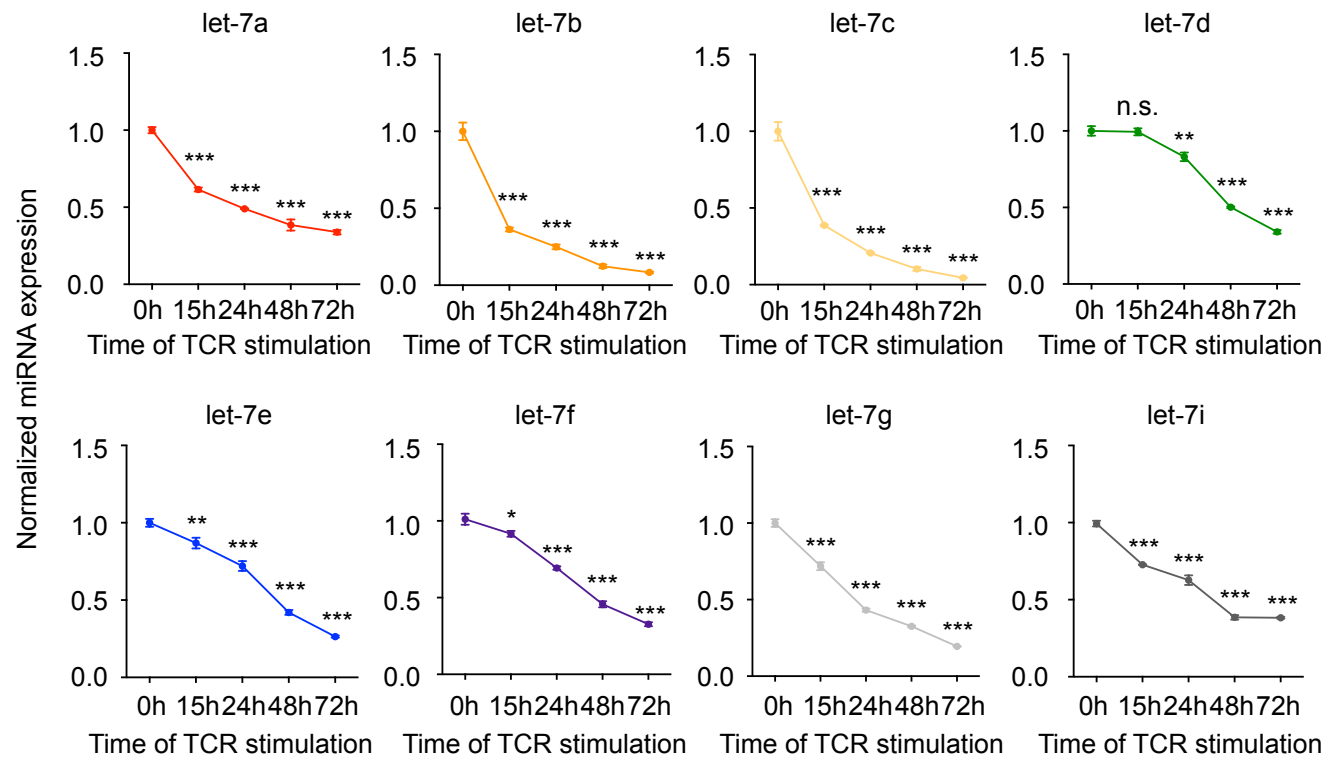**Figure 1- figure supplement 1**

Supplement: supp [file elife-26398-supp-v1.zip]

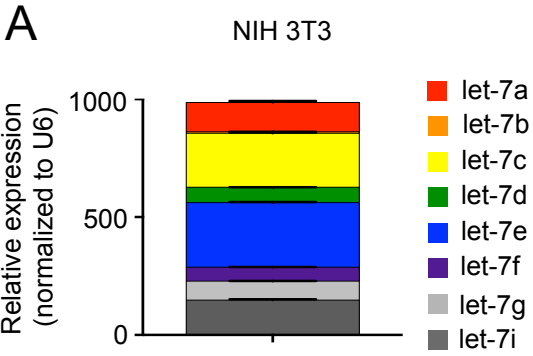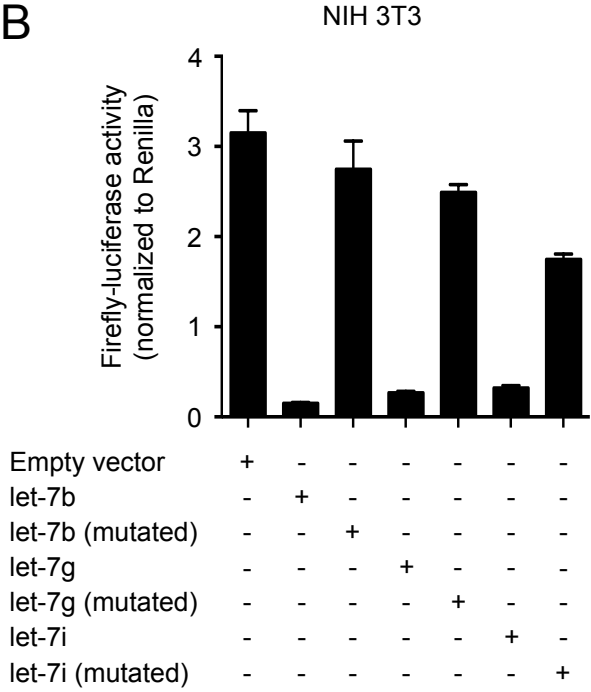

**Figure 5- figure supplement 2**

Supplement: supp [file elife-26398-supp-v1.zip]

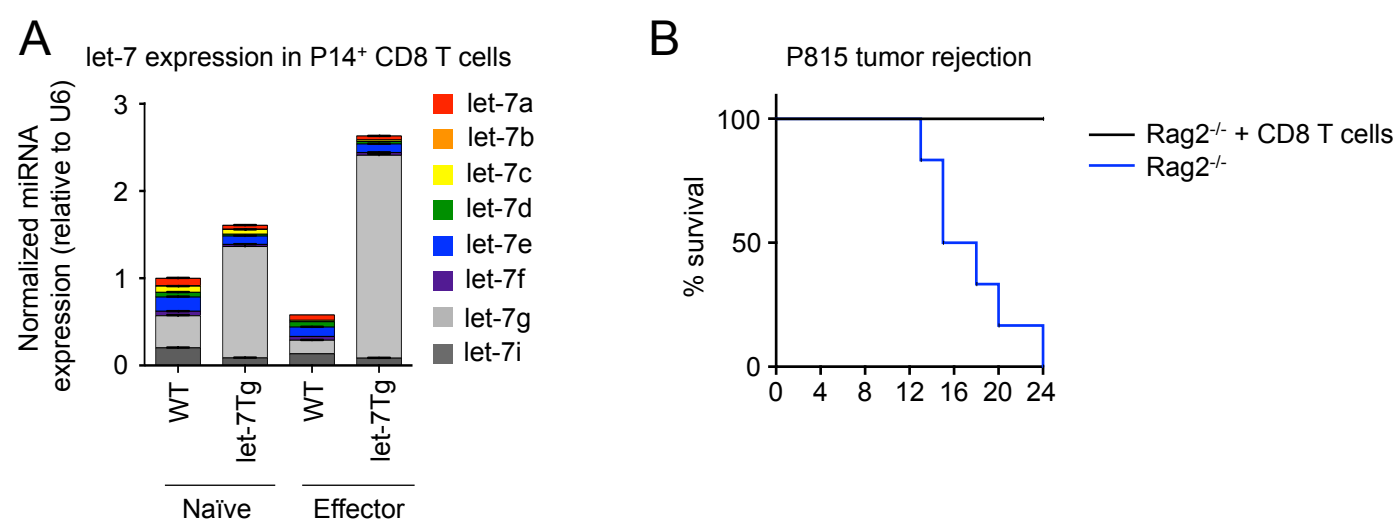

**Figure 2- figure supplement 1**

Supplement: supp [file elife-26398-supp-v1.zip › elife_poa_e26398_Figure_2_figure_supplement_1.pdf]

**A**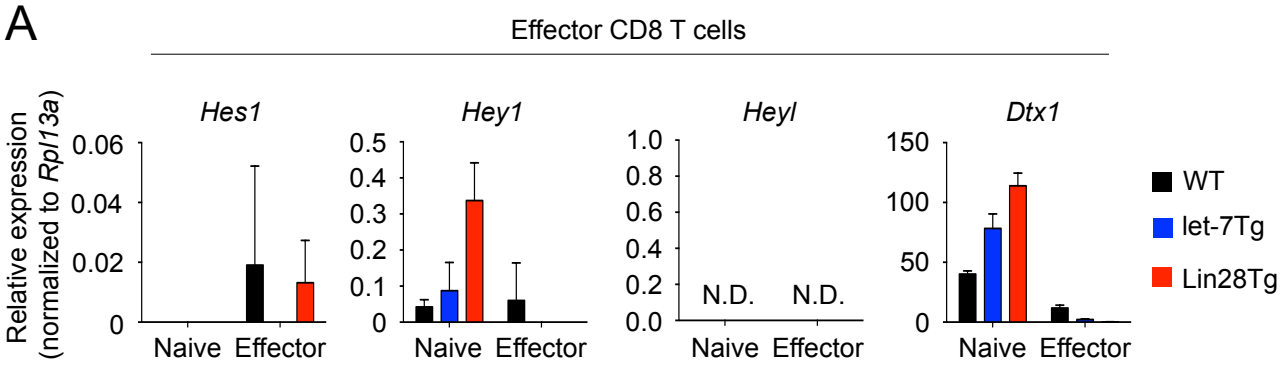**B**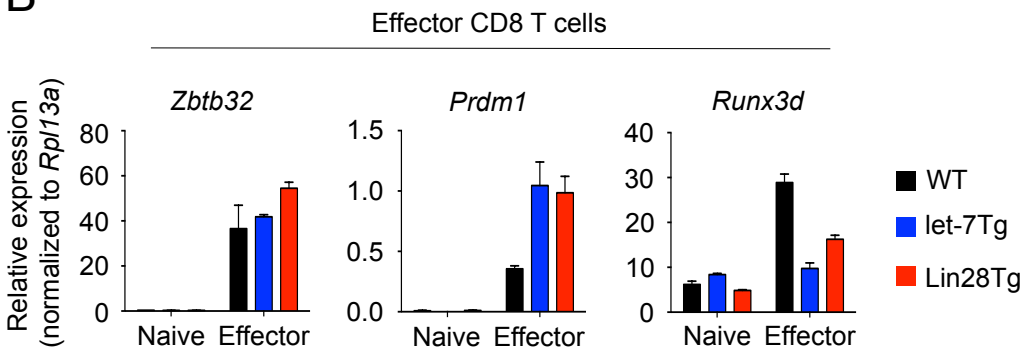

Figure 5- figure supplement 1

Supplement: supp [file elife-26398-supp-v1.zip › elife_poa_e26398_Figure_5_figure_supplement_1.pdf]

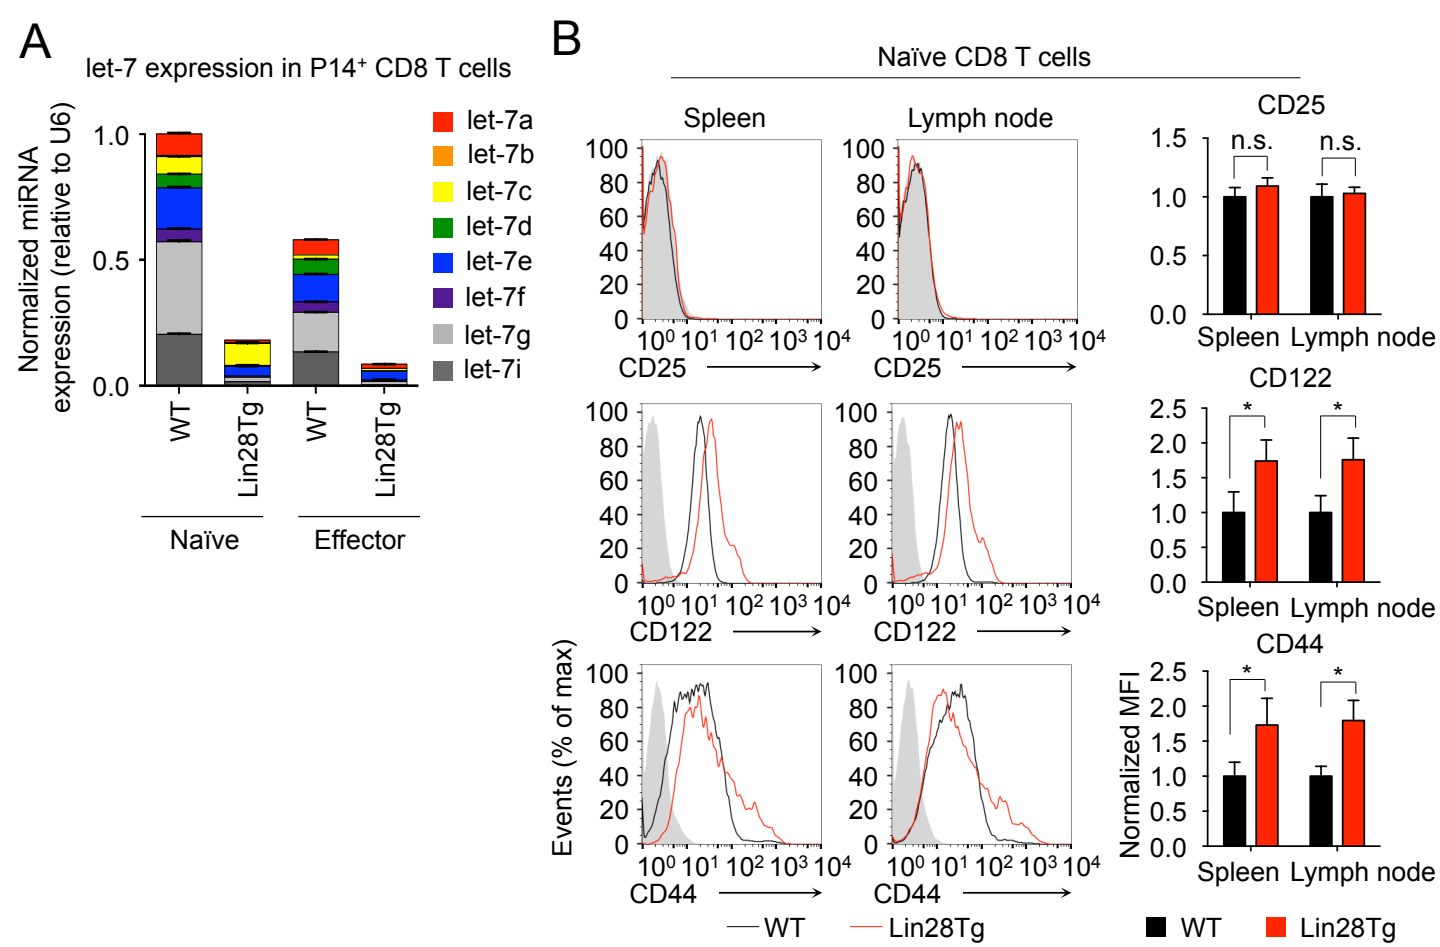

**Figure 1- figure supplement 3**

Supplement: supp [file elife-26398-supp-v1.zip › elife_poa_e26398_Figure_1_figure_supplement_3.pdf]

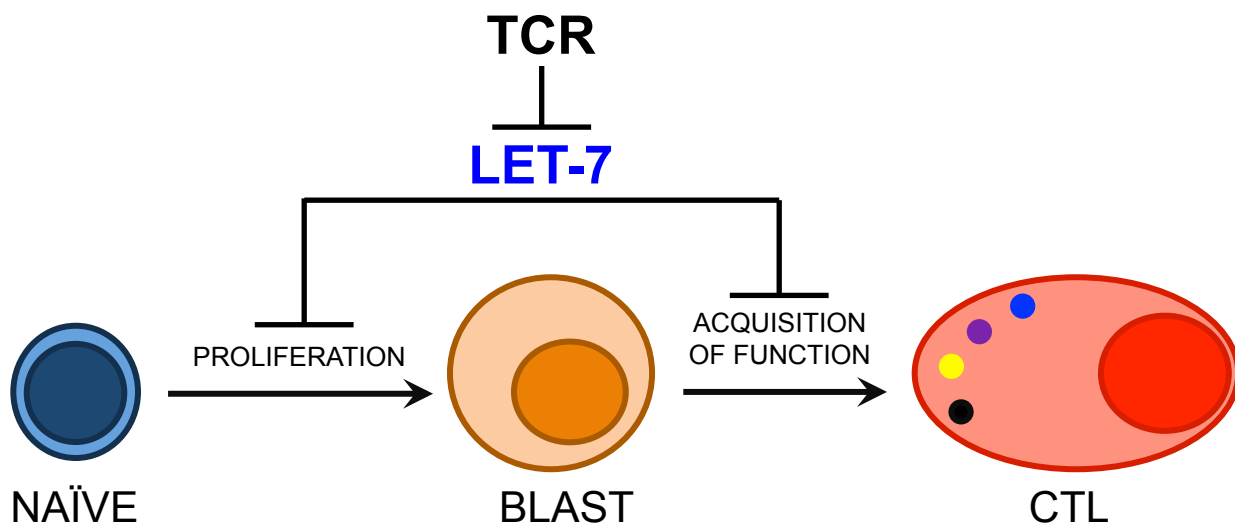

Figure 6- figure supplement 3

Supplement: supp [file elife-26398-supp-v1.zip › elife_poa_e26398_Figure_6_figure_supplement_3.pdf]
